# Supplementary material for: Self-Assessment of Adherence to Medication: A Case Study in Campania Region Community-Dwelling Population
Source: Hindawi journal article supplement (doi:10.1155/2015/682503), 2015-01-01
Supplement: f1 [file 682503.f1.pdf]

Table S1. Questionnaire used for interview including MMAS-8.

|                                                                                                                                                                                                     |                                                                                                                                                                                                                                                                          |                                                      |                                   |
|-----------------------------------------------------------------------------------------------------------------------------------------------------------------------------------------------------|--------------------------------------------------------------------------------------------------------------------------------------------------------------------------------------------------------------------------------------------------------------------------|------------------------------------------------------|-----------------------------------|
| <b>General information:</b>                                                                                                                                                                         |                                                                                                                                                                                                                                                                          |                                                      |                                   |
| Surname: _____                                                                                                                                                                                      |                                                                                                                                                                                                                                                                          | Name: _____                                          |                                   |
| Gender:                                                                                                                                                                                             | <input type="checkbox"/> M                                                                                                                                                                                                                                               | <input type="checkbox"/> F                           | Age: _____                        |
| <b>Education Level:</b>                                                                                                                                                                             |                                                                                                                                                                                                                                                                          |                                                      |                                   |
| <input type="checkbox"/> Primary school graduation                                                                                                                                                  |                                                                                                                                                                                                                                                                          | <input type="checkbox"/> Secondary school graduation |                                   |
| <input type="checkbox"/> High school graduation                                                                                                                                                     |                                                                                                                                                                                                                                                                          | <input type="checkbox"/> Degree graduation           |                                   |
| <b>Smoker:</b> <input type="checkbox"/> Yes <input type="checkbox"/> No                                                                                                                             |                                                                                                                                                                                                                                                                          |                                                      |                                   |
| <b>Diseases:</b>                                                                                                                                                                                    |                                                                                                                                                                                                                                                                          |                                                      |                                   |
| <input type="checkbox"/> Hypertension                                                                                                                                                               | <input type="checkbox"/> Health failure                                                                                                                                                                                                                                  | <input type="checkbox"/> COPD                        | <input type="checkbox"/> Diabetes |
| <input type="checkbox"/> Gastritis                                                                                                                                                                  | <input type="checkbox"/> Renal failure                                                                                                                                                                                                                                   | <input type="checkbox"/> Osteoporosis                |                                   |
| <b>N. of medications:</b> <input type="checkbox"/> 1 <input type="checkbox"/> 2 <input type="checkbox"/> 3 <input type="checkbox"/> 4 <input type="checkbox"/> 5 <input type="checkbox"/> 6 or more |                                                                                                                                                                                                                                                                          |                                                      |                                   |
| <b>©Morisky Medication Adherence Scale (MMAS-8-Item).</b>                                                                                                                                           |                                                                                                                                                                                                                                                                          |                                                      | <b>No</b>                         |
| 1                                                                                                                                                                                                   | Do you sometimes forget to take your medication(s)?                                                                                                                                                                                                                      |                                                      |                                   |
| 2                                                                                                                                                                                                   | People sometimes miss taking their medications for reasons other than forgetting. Thinking over the past two weeks, were there any days when you did not take your medication(s)?                                                                                        |                                                      |                                   |
| 3                                                                                                                                                                                                   | Have you ever cut back or stopped taking your medication(s) without telling your doctor, because you felt worse when you took it?                                                                                                                                        |                                                      |                                   |
| 4                                                                                                                                                                                                   | When you travel or leave home, do you sometimes forget to bring along your medication(s)?                                                                                                                                                                                |                                                      |                                   |
| 5                                                                                                                                                                                                   | Did you take your medication(s) yesterday?                                                                                                                                                                                                                               |                                                      |                                   |
| 6                                                                                                                                                                                                   | When you feel like your is under control, do you sometimes stop taking your medication(s)?                                                                                                                                                                               |                                                      |                                   |
| 7                                                                                                                                                                                                   | Taking medication(s) everyday is a real inconvenience for some people. Do you ever feel hassled about sticking to your treatment plan?                                                                                                                                   |                                                      |                                   |
| 8                                                                                                                                                                                                   | How often do you have difficulty remembering to take all your medication(s)?<br><input type="checkbox"/> Never/Rarely <input type="checkbox"/> Once in a while <input type="checkbox"/> Sometimes <input type="checkbox"/> Usually <input type="checkbox"/> All the time |                                                      |                                   |

Use of the ©MMAS is protected by US copyright laws. Permission for use is required. A license agreement is available from Donald E. Morisky, ScD, ScM, MSPH, Professor, Department of Community Health Sciences, UCLA School of Public Health, 650 Charles E. Young Drive South, Los Angeles, CA 90095-1772, [dmorisky@ucla.edu](mailto:dmorisky@ucla.edu)
